# Supplementary material for: Alternate processing of Flt1 transcripts is directed by conserved cis-elements within an intronic region of FLT1 that reciprocally regulates splicing and polyadenylation
Source: PubMed Central journal article supplement — Nucleic Acids Res. 2010 Apr 12;38(15):5130–40. doi: 10.1093/nar/gkq198 (PMC2926593; doi:10.1093/nar/gkq198), 2010-04-12
Supplement: gkq198_1.pdf [file gkq198_1.pdf]

## **Method.**

Flt1, sFlt1, sFlt1\_v3, and sFlt1\_v4 were amplified from a variety of cells using primers shown in Table. Real-time PCRs were done using Brilliant SYBR Green QPCR master mix (Stratagene) with the following cycling conditions: one cycle for 10 min at 95°C followed by 35-40 cycles (10-15 cycles for 18S rRNA) of 30 sec denaturation at 95°C, 1-min annealing at 56–60°C, and 1-min extension at 72°C. The number of cycles, annealing temperature, and extension time were varied as appropriate for the abundance of transcripts, the melting temperature of primers, and the size of amplicons. All reactions were performed in an Mx3000p Multiplex quantitative PCR system (Stratagene) and dissociation curves were generated for all samples.

## **Table**

|                 | <b>Forward</b>                          | <b>Reverse</b>                    |
|-----------------|-----------------------------------------|-----------------------------------|
| <b>sFlt1_v3</b> | 5'-GTC GAC ACA GTG GCC ATC AGC AGT T-3' | 5'-GCG AAT AAG GCA GGA CAC ACA-3' |
| <b>Flt1</b>     | Same as above                           | 5'-TTC CAC AGA GCC CTT CTG GTT-3' |
| <b>sFlt1_v4</b> | 5'-TGG CCA TCA CTA AGG AGC ACT-3'       | 5'-CCC AGT GTT TGG GGC TCT ATC-3' |
| <b>sFlt1</b>    | Same as above                           | 5'-TCC GAG CCT GAA AGT TAG CAA-3' |

## **Figure legends**

**Figure 1. Alternate transcripts of sFlt1. A:** Schematic of the sFlt1 transcripts compared to Flt1. The genomic organization of FLT1 between exons 13 and 15 are shown above with exons and introns drawn to different scales. Below are shown each of the 5 described transcripts for FLT1 using the nomenclature of Thomas *et al.*, and Heydarian *et al.*

**Figure 2. Abundance of sFlt1 and Flt1 transcripts in CTB and HUVEC. A: Real time RT-PCR** in CTB (panels A and C) and HUVEC (panels B and D). In panels A and B, sFlt1\_v3 and Flt1 were amplified with the same forward primer but distinct reverse primers (exon 15b and exon 15 respectively). The expression of Flt1 is expressed as fold difference compared to sFlt1\_v3. In panels C and D, sFlt1 and sFlt1\_v4 were amplified with the same forward primer but distinct reverse primers (intron 13 and 14 respectively). The expression of sFlt1 is expressed as fold difference compared to sFlt1\_v4. \*p< 0.001 for all panels by 1 tailed student's *t*-test.

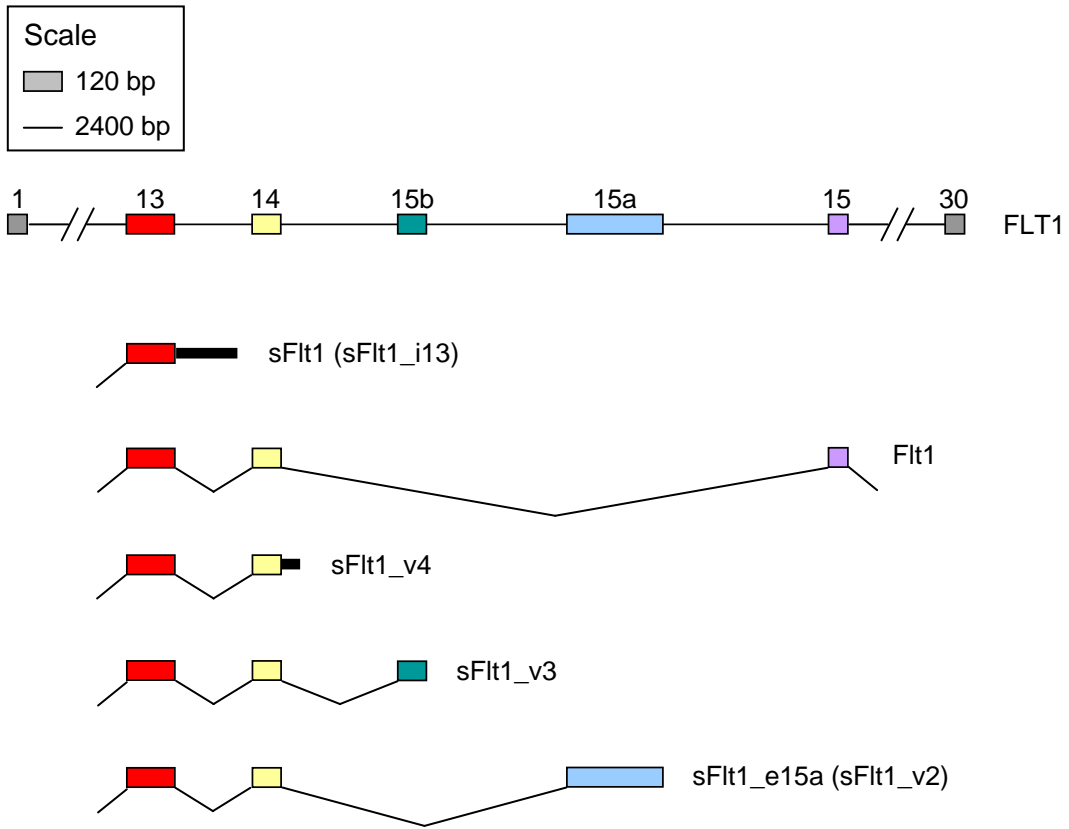

Figure 1

p<0.001 1-tailed t-test

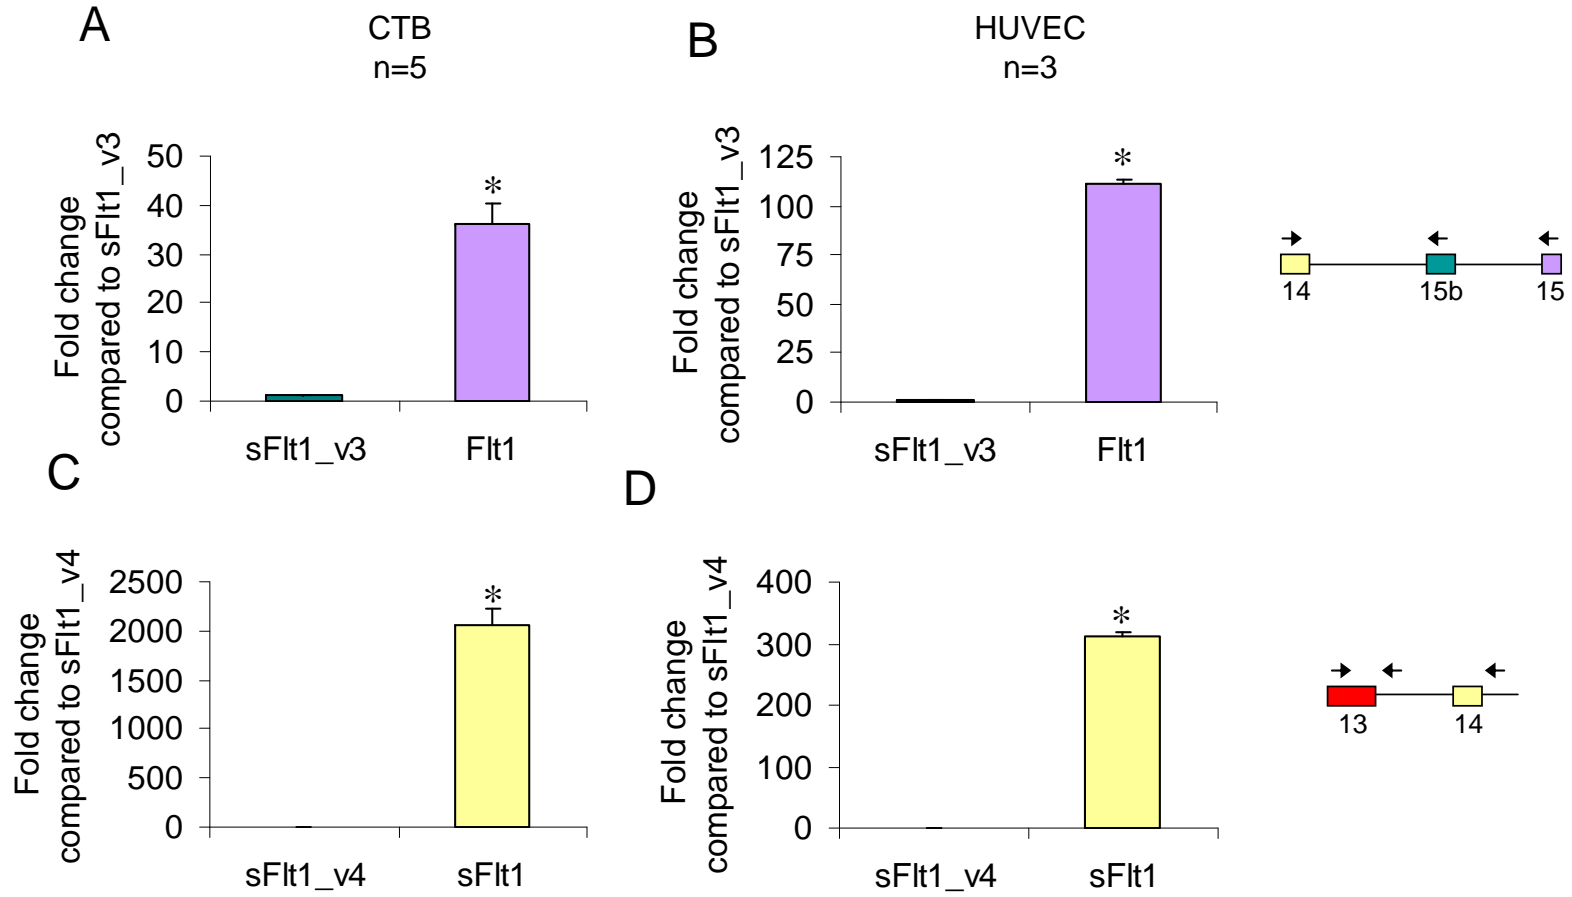

Figure 2
